# Supplementary material for: Psychosocial Interventions to Improve Psychological, Social and Physical Wellbeing in Family Members Affected by an Adult Relative’s Substance Use: A Systematic Search and Review of the Evidence
Source: PubMed Central journal article supplement (PMC7918716; doi:10.3390/ijerph18041793), 2021-02-12
Supplement: ijerph-18-01793-s001.pdf [file ijerph-18-01793-s001.pdf]

1. substance-related disorders/ or alcohol-related disorders/ or amphetamine-related disorders/ or cocaine-related disorders/ or drug overdose/ or inhalant abuse/ or marijuana abuse/ or opioid-related disorders/ or phencyclidine abuse/ or psychoses, substance-induced/ or substance abuse, intravenous/ or substance withdrawal syndrome/ or alcohol withdrawal delirium/ or alcohol withdrawal seizures/
2. ((stimulant\* or polydrug\* or drug\* or substance) adj6 (abus\* or dependen\* or addict\* or disorder\* or intoxicat\* or misuse\*)).ab,ti.
3. exp alcohol drinking/
4. (alcohol adj3 (dependen\* or drink\* or intoxicat\* or abus\* or misus\* or risk\* or consum\* or excess\* or reduc\* or intervention\*)).ab,ti.
5. (drink\* adj3 (excess or heavy or heavily or harm or harmful or hazard\* or risky or binge or harmful or problem\*)).ab,ti.
6. (addict\* or abstain\* or abstinen\*).ab,ti.
7. (heroin or methadone or temegestic or subutex or opiate\* or crack cocaine or cocaine or ecstasy or methamphetamine\* or crystal meth or amphetamine\* or cannabis or marijuana or marijuana or lsd or magic mushrooms or mephedrone or khat or cathinone or ketamine or gammahydroxybutrate or ghb or amyl nitrate).ab,ti.
8. 1 or 2 or 3 or 4 or 5 or 6 or 7
9. family/ or caregiver/ or parent-child relations/ or father-child relations/ or mother-child relations/ or parenting/ or paternal behavior/ or paternal deprivation/
10. (famil\* or significant other or affected other\* or caregiver or carer or spouse or husband or wife or wives or partner\* or parent\* or father\* or mother\* or sibling\* or brother\* or sister\* or child\* or son\* or daughter\* or grandparent\* or grandmother\* or grandfather\* or relative\*).ab,ti
11. 9 or 10
12. psychotherapy/ or exp behavior therapy/ or exp cognitive therapy/ or exp relaxation therapy/ or gestalt therapy/ or narrative therapy/ or nondirective therapy/
13. play therapy/ or exp psychoanalytic therapy/ or exp psychotherapeutic processes/ or psychotherapy, brief/ or psychotherapy, multiple/ or psychotherapy, psychodynamic/
14. psychotherapy, rational-emotive/ or reality therapy/
15. socioenvironmental therapy/
16. counseling/ or exp directive counseling/
17. (motivat\* adj5 (interview\* or therap\* or consult\* or intervention\* or enhance\*)).ab,ti.
18. (brief adj3 intervention\* ).ab,ti.
19. (cognit\* adj2 (train\* or behavior\* or therap\* or technique\* or skill\*)).ab,ti.
20. ((psychodynamic or psychosocial) adj2 (therap\$ or treatment\$ or intervention\$ or program\$)).ab,ti.
21. (psychotherap\* or counsel\* or residential rehabilitation).ab,ti.
22. ((relaxation or imagery) adj2 (therap\$ or technique\$)).ab,ti.
23. (family adj2 therap\*).ab,ti.
24. (case adj2 management).ab,ti.
25. ((coping skill\* or cbst or self control or assertive\*) adj2 (training or therap\*)).ab,ti.
26. 12 or 13 or 14 or 15 or 16 or 17 or 18 or 19 or 20 or 21 or 22 or 23 or 24 or 25
27. (randomized controlled trial or controlled clinical trial).pt.
28. (randomized or placebo).ab.
29. clinical trials as topic.sh.
30. randomly.ab.
31. trial.ti.

- 32. 27 or 28 or 29 or 30 or 31
- 33. exp animals/ not humans.sh.
- 34. 32 not 33
- 35. 8 and 11 and 34
